# Supplementary material for: Pentaglyme–K salt binary mixtures: phase behavior, solvate structures, and physicochemical properties
Source: Royal Society of Chemistry journal article supplement (doi:10.1039/c4cp05017g), 2014-12-05
Supplement: c4cp05017g1.pdf [file c4cp05017g1.pdf]

Supporting Information for:

# *Pentaglyme-K Salts Binary Mixtures: Phase Behavior, Solvate Structures, and Physicochemical Properties*

*Toshihiko Mandai,<sup>†,‡,\*</sup> Seiji Tsuzuki,<sup>‡</sup> Kazuhide Ueno,<sup>†</sup> Kaoru Dokko,<sup>†,§</sup> and Masayoshi Watanabe<sup>†,\*</sup>*

<sup>†</sup>Department of Chemistry and Biotechnology, Yokohama National University,

79-5 Tokiwadai, Hodogaya-ku, Yokohama 240-8501, Japan

<sup>‡</sup>National Institute of Advanced Industrial Science and Technology (AIST),

Tsukuba Central 2, Tsukuba, Ibaraki 305-8568, Japan

<sup>§</sup>Unit of Elements Strategy Initiative for Catalysts & Batteries (ESICB), Kyoto University,

Kyoto 615-8510, Japan

<sup>‡</sup>Department of Applied Physics, Chalmers University of Technology,

Göteborg, SE-412 96, Sweden

We summarize the complete analytical data for a series of  $[\text{K}(\text{G5})_n]\text{X}$ . DSC and TG curves of  $[\text{K}(\text{G5})_n]\text{X}$  with  $[\text{TFSA}]^-$ ,  $[\text{TfO}]^-$ ,  $[\text{NfO}]^-$ ,  $\text{PF}_6^-$ , and  $\text{SCN}^-$  anions are shown in **Figures S1** and **S3**. Optimized structures of a series of parent K salts are displayed in **Figure S2**. Selected torsion angles and selected K–O<sub>glyme</sub> distances of the solved structures in the crystalline state are listed in **Tables S2** and **S3**, respectively. Thermal ellipsoid model of  $[\text{K}(\text{G5})_1][\text{TfO}]$  is displayed in **Figure S4**. Crystallographic data (**Table S1**), solvate structures (**Figures S5–S7**), anionic Raman spectra (**Figure S8**), and selected vibrational frequencies (**Table S4**) of  $[\text{K}(\text{18C6})_1]\text{X}$  are also included below. In addition, Raman spectra for  $[\text{K}(\text{G5})_2]\text{PF}_6$  is attached in **Figure S9**. Temperature dependences of density, concentration, viscosity, and ionic conductivity for  $[\text{K}(\text{G5})_1][\text{TFSA}]$ ,  $[\text{K}(\text{G5})_1][\text{NfO}]$ , and  $[\text{K}(\text{G5})_1]\text{SCN}$  are also included in **Figures S10** and **S11**.

**Table S1.** Crystallographic data of [K(G5)<sub>1</sub>][TfO], [K(18C6)<sub>1</sub>][TfO], [K(18C6)<sub>1</sub>]PF<sub>6</sub>, and [K(18C6)<sub>1</sub>]SCN.

|                                                    | [K(G5) <sub>1</sub> ][TfO]                                       | [K(18C6) <sub>1</sub> ][TfO]                                     | [K(18C6) <sub>1</sub> ]PF <sub>6</sub>                           | [K(18C6) <sub>1</sub> ]SCN                                                                  |
|----------------------------------------------------|------------------------------------------------------------------|------------------------------------------------------------------|------------------------------------------------------------------|---------------------------------------------------------------------------------------------|
| Chemical formula                                   | C <sub>13</sub> H <sub>26</sub> F <sub>3</sub> KO <sub>9</sub> S | C <sub>13</sub> H <sub>24</sub> F <sub>3</sub> KO <sub>9</sub> S | C <sub>12</sub> H <sub>24</sub> F <sub>6</sub> KO <sub>6</sub> P | C <sub>13</sub> H <sub>24</sub> K <sub>1</sub> N <sub>1</sub> O <sub>6</sub> S <sub>1</sub> |
| Formula weight                                     | 454.50                                                           | 344.72                                                           | 388.77                                                           | 361.49                                                                                      |
| Crystal system                                     | Orthorhombic                                                     | Monoclinic                                                       | Orthorhombic                                                     | Monoclinic                                                                                  |
| Space group                                        | <i>Pbca</i>                                                      | <i>P2<sub>1</sub>/n</i>                                          | <i>Pnn2</i>                                                      | <i>P2<sub>1</sub>/c</i>                                                                     |
| <i>a</i> / Å                                       | 16.209(3)                                                        | 8.6188(6)                                                        | 7.840(3)                                                         | 8.182(3)                                                                                    |
| <i>b</i> / Å                                       | 15.443(3)                                                        | 16.5613(10)                                                      | 10.813(5)                                                        | 14.222(4)                                                                                   |
| <i>c</i> / Å                                       | 16.537(2)                                                        | 14.2025(11)                                                      | 11.426(5)                                                        | 7.709(3)                                                                                    |
| <i>α</i> / °                                       | 90                                                               | 90                                                               | 90                                                               | 90                                                                                          |
| <i>β</i> / °                                       | 90                                                               | 95.439(4)                                                        | 90                                                               | 98.717(5)                                                                                   |
| <i>γ</i> / °                                       | 90                                                               | 90                                                               | 90                                                               | 90                                                                                          |
| <i>V</i> / Å <sup>3</sup>                          | 4139.5(11)                                                       | 2018.1(3)                                                        | 968.7(7)                                                         | 886.8(5)                                                                                    |
| <i>Z</i>                                           | 8                                                                | 4                                                                | 2                                                                | 2                                                                                           |
| <i>D</i> <sub>calc</sub> / g cm <sup>-3</sup>      | 1.448                                                            | 1.489                                                            | 1.537                                                            | 1.354                                                                                       |
| <i>μ</i> / mm <sup>-1</sup>                        | 0.4242                                                           | 0.4348                                                           | 0.4372                                                           | 0.442                                                                                       |
| Temp. / °C                                         | -100                                                             | -100                                                             | -100                                                             | -100                                                                                        |
| Reflections collected                              | 30178                                                            | 15495                                                            | 7086                                                             | 6828                                                                                        |
| Independent reflection, <i>R</i> <sub>int</sub>    | 4730, 0.0469                                                     | 4629, 0.0376                                                     | 2192, 0.0442                                                     | 2023, 0.0446                                                                                |
| <i>R</i> <sub>1</sub> [ <i>I</i> > 2σ( <i>I</i> )] | 0.0534                                                           | 0.0798                                                           | 0.0540                                                           | 0.0473                                                                                      |
| <i>wR</i> <sub>2</sub> (all data)                  | 0.1354                                                           | 0.2249                                                           | 0.1643                                                           | 0.1252                                                                                      |
| GooF                                               | 1.149                                                            | 1.073                                                            | 1.060                                                            | 1.125                                                                                       |

**Table S2.** Selected torsion angles of the coordinating glymes for [K(G5)<sub>1</sub>][TFSA], [K(G5)<sub>1</sub>][TfO], and [K(G5)<sub>1</sub>][PF<sub>6</sub>] solvates. For [K(G5)<sub>1</sub>][TFSA], the angles of the octa-coordinated solvate were listed. Atomic numbering is corresponding to the numbering in each crystallographic data.

| Selected angles / ° | [K(G5) <sub>1</sub> ][TFSA] | [K(G5) <sub>1</sub> ][TfO] | [K(G5) <sub>1</sub> ][PF <sub>6</sub> ] |
|---------------------|-----------------------------|----------------------------|-----------------------------------------|
| C1–O1–C2–C3         | -176.3(4)                   | -179.18(17)                | 170.4(2)                                |
| O1–C2–C3–O2         | 64.9(5)                     | 64.7(3)                    | -62.8(3)                                |
| C2–C3–O2–C4         | 167.8(3)                    | 174.47(15)                 | -171.43(19)                             |
| C3–O2–C4–C5         | 174.3(3)                    | -175.76(15)                | -174.70(19)                             |
| O2–C4–C5–O3         | -68.6(5)                    | -68.5(3)                   | 71.4(3)                                 |
| C4–C5–O3–C6         | -178.5(4)                   | -179.82(16)                | -179.81(17)                             |
| C5–O3–C6–C7         | 171.7(4)                    | 175.12(16)                 | -174.33(17)                             |
| O3–C6–C7–O4         | 64.5(6)                     | 64.8(3)                    | -65.3(3)                                |
| C6–C7–O4–C8         | -176.8(4)                   | 175.44(16)                 | -172.68(17)                             |
| C7–O4–C8–C9         | 175.2(4)                    | -179.44(16)                | 178.91(18)                              |
| O4–C8–C9–O5         | -69.3(5)                    | -69.8(3)                   | 69.7(3)                                 |
| C8–C9–O5–C10        | -174.0(3)                   | 174.31(15)                 | 175.28(17)                              |
| C9–O5–C10–C11       | 172.0(3)                    | 170.92(16)                 | -178.63(17)                             |
| O5–C10–C11–O6       | 70.2(4)                     | 62.5(3)                    | -69.2(3)                                |
| C10–C11–O6–C12      | -173.9(3)                   | -172.55(18)                | 176.59(19)                              |

**Table S3.** Distances between  $K^+$  cation and oxygen atoms of the coordinating glymes for  $[K(G5)_1][TFSA]$ ,  $[K(G5)_1][TfO]$ , and  $[K(G5)_1]PF_6$  solvates. For  $[K(G5)_1][TFSA]$ , the distances of the octa-coordinated solvate were listed. Atomic numbering is corresponding to the numbering in each crystallographic data.

| Distances / Å | $[K(G5)_1][TFSA]$ | $[K(G5)_1][TfO]$ | $[K(G5)_1]PF_6$ |
|---------------|-------------------|------------------|-----------------|
| K1–O1         | 2.850(4)          | 2.8887(18)       | 2.8201(19)      |
| K1–O2         | 2.850(4)          | 2.8531(17)       | 2.9100(19)      |
| K1–O3         | 2.855(3)          | 2.8817(16)       | 2.8648(18)      |
| K1–O4         | 2.906(4)          | 2.8584(16)       | 2.8322(17)      |
| K1–O5         | 2.826(4)          | 2.9427(17)       | 2.8807(18)      |
| K1–O6         | 2.913(3)          | 2.8888(17)       | 2.9069(19)      |

**Table S4.** Selected vibrational frequencies of the coordinating glymes and counter anions observed in the measured Raman spectra for  $[K(18C6)_1]X$  at ambient temperature.

|                | Raman shift / $cm^{-1}$ |                    |                    |                   |                  |
|----------------|-------------------------|--------------------|--------------------|-------------------|------------------|
|                | $[K(18C6)_1][TFSA]$     | $[K(18C6)_1][TfO]$ | $[K(18C6)_1][NfO]$ | $[K(18C6)_1]PF_6$ | $[K(18C6)_1]SCN$ |
| Complex cation | 870                     | 871                | 873                | 874               | 870              |
|                | 833                     | 831                | 834                | 835               | 834              |
| Counter anions | 742                     | 1033               | 1024               | 743               | 735              |

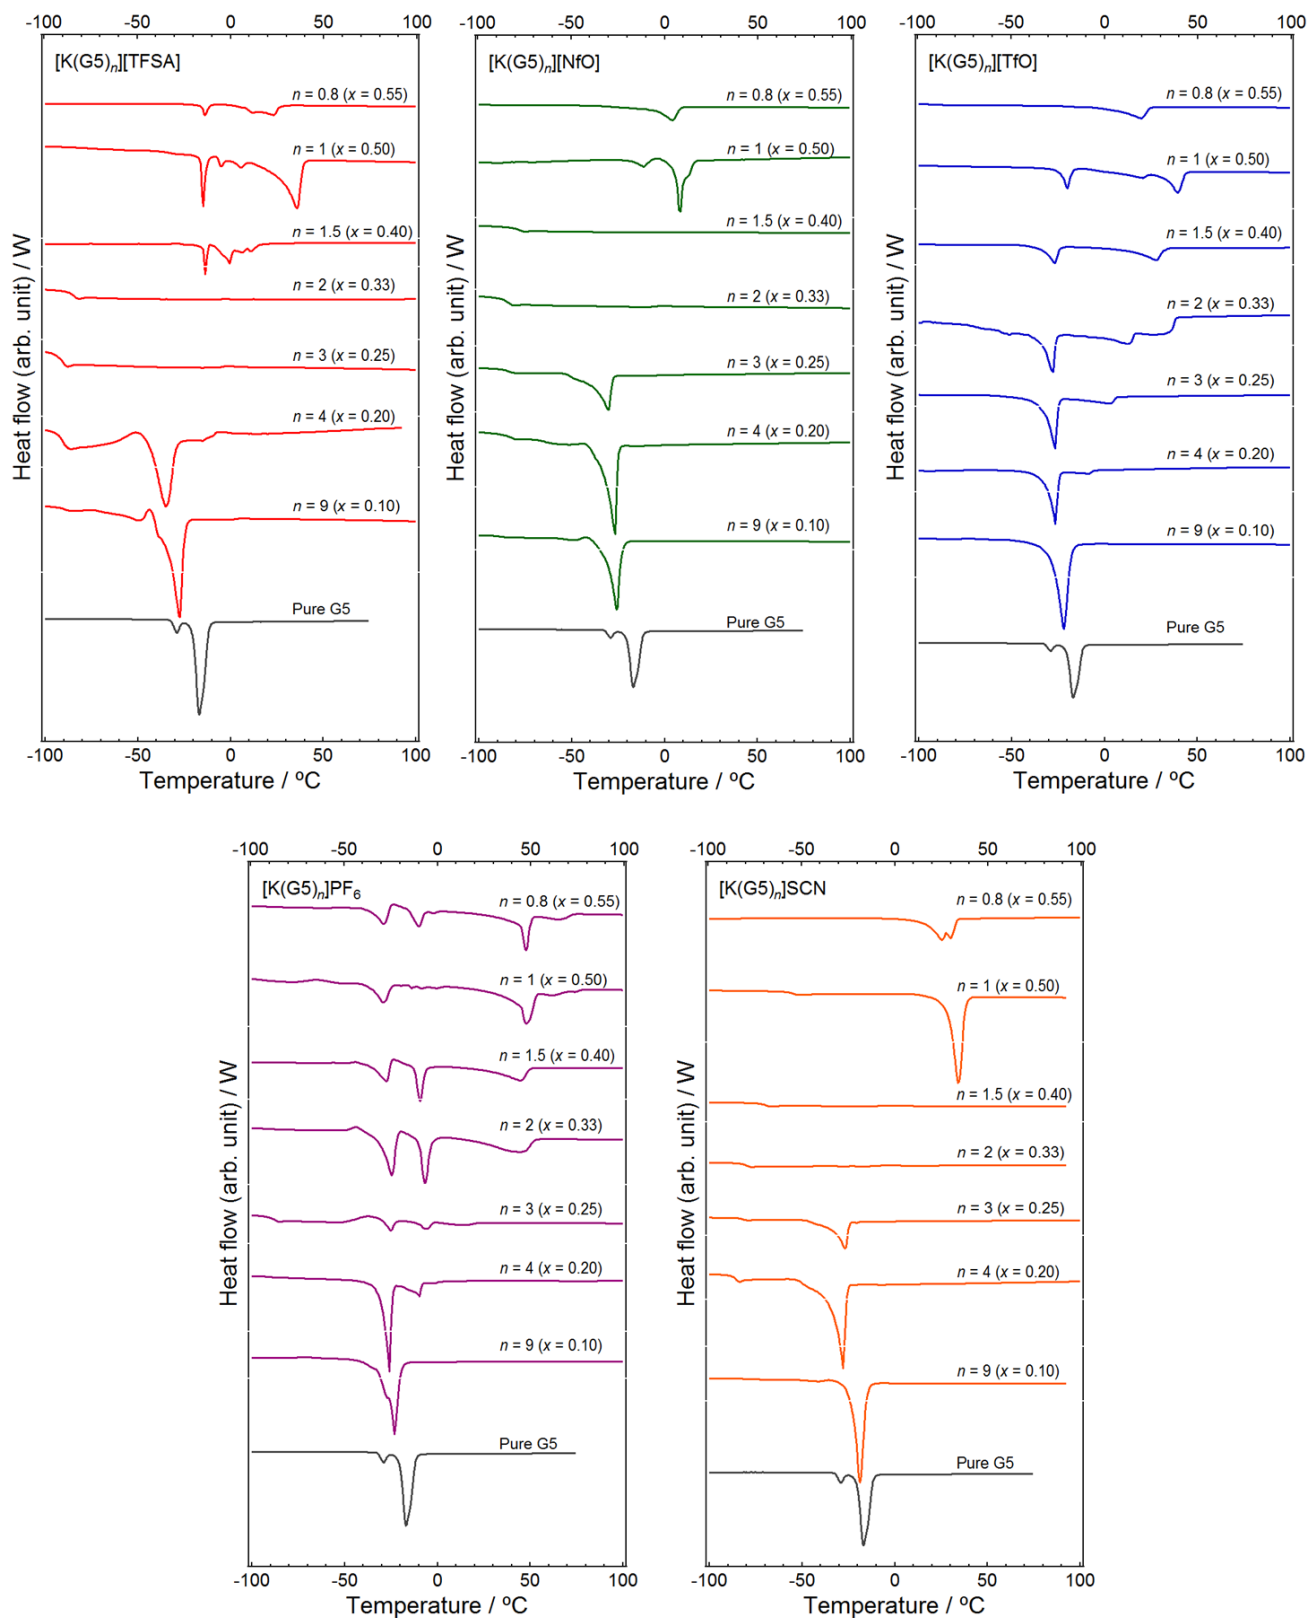

**Figure S1.** DSC curves of [K(G5)<sub>n</sub>]X with [TFSA]<sup>-</sup>, [TfO]<sup>-</sup>, [NfO]<sup>-</sup>, PF<sub>6</sub><sup>-</sup>, and SCN<sup>-</sup> anions.

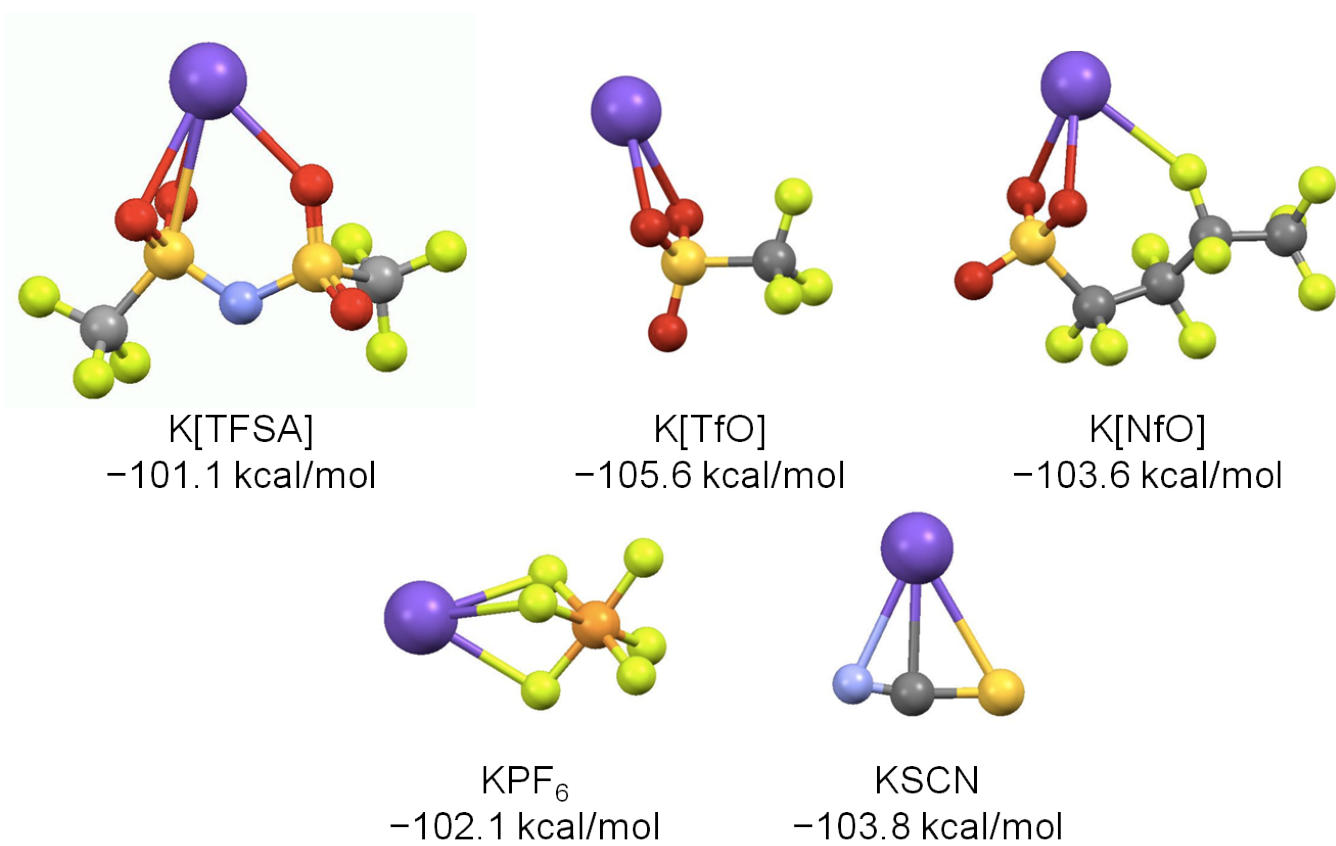

**Figure S2.** Optimized structures of a series of parent K-salts calculated by *ab initio* quantum calculation.

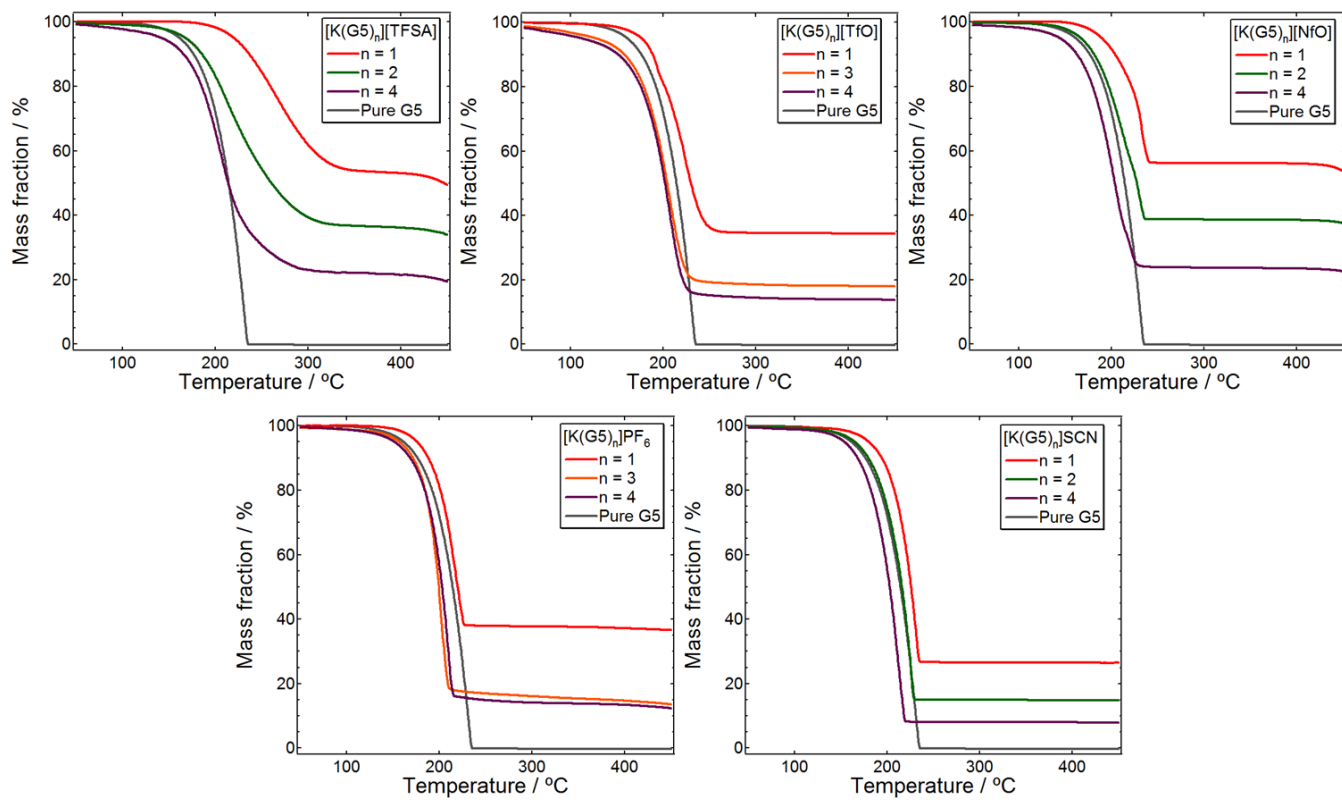

**Figure S3.** TG curves of the selected  $[K(G5)_n]X$  paired with  $[TFSA]^-$ ,  $[TfO]^-$ ,  $[NfO]^-$ ,  $PF_6^-$ , and  $SCN^-$  anions. The curves of Pure G5 was also included in each figure.

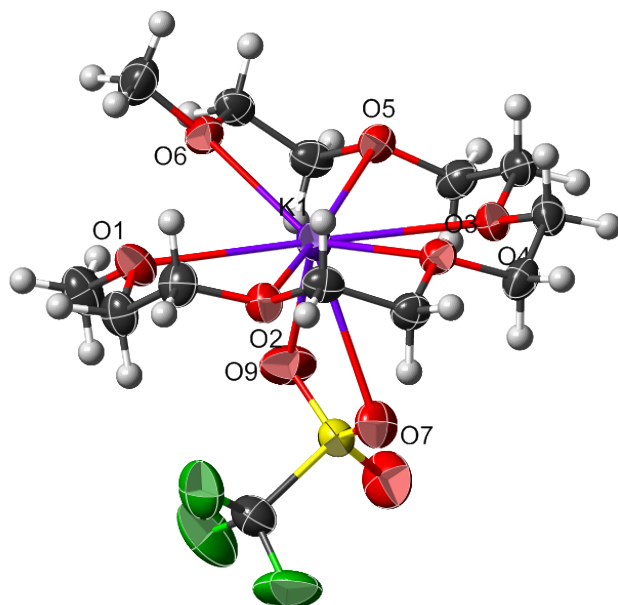

**Figure S4.** Thermal ellipsoid model of [K(G5)<sub>1</sub>][TfO]. The ellipsoids of non-hydrogen atoms are drawn at the 50 % probability level while isotropic hydrogen atoms are represented by spheres of arbitrary size. The labels of uncoordinating atoms are omitted for clarity. CCDC: 1030104.



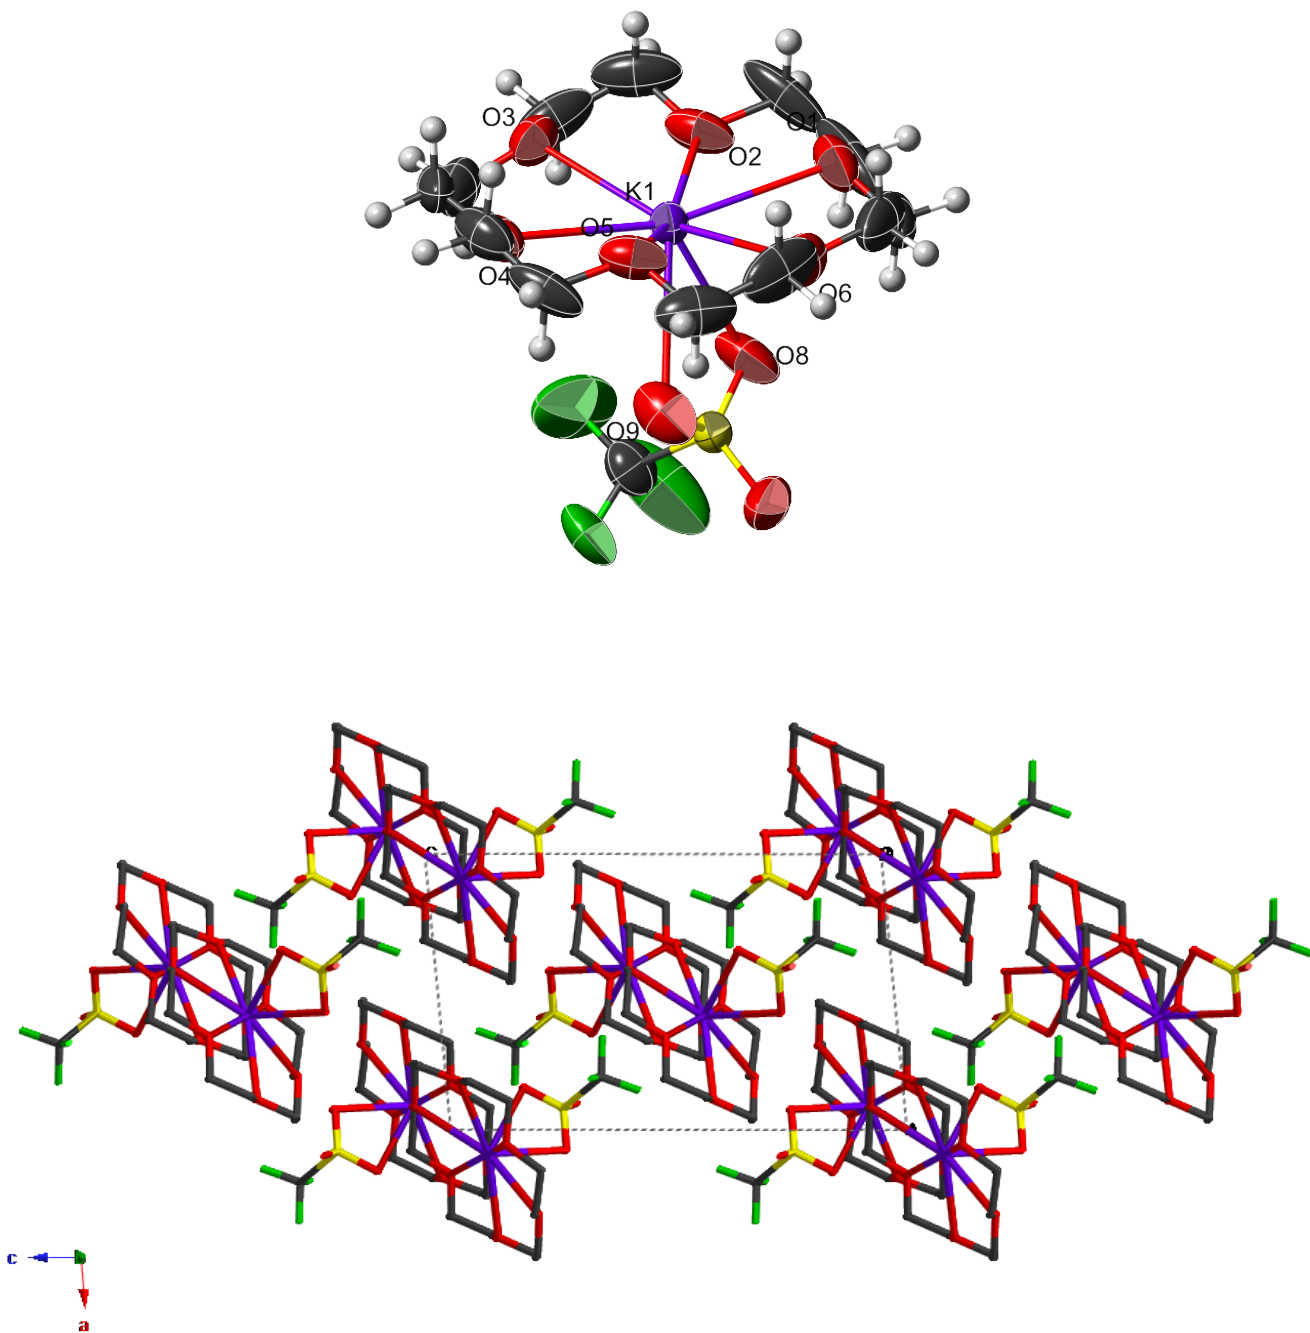

**Figure S5.** Thermal ellipsoid model (upper) and packing structure along *b*-axis (lower) of  $[\text{K}(\text{18C6})_1][\text{TfO}]$ . The ellipsoids of non-hydrogen atoms are drawn at the 50 % probability level while isotropic hydrogen atoms are represented by spheres of arbitrary size. The labels of uncoordinating atoms are omitted for clarity. CCDC: 1030105.

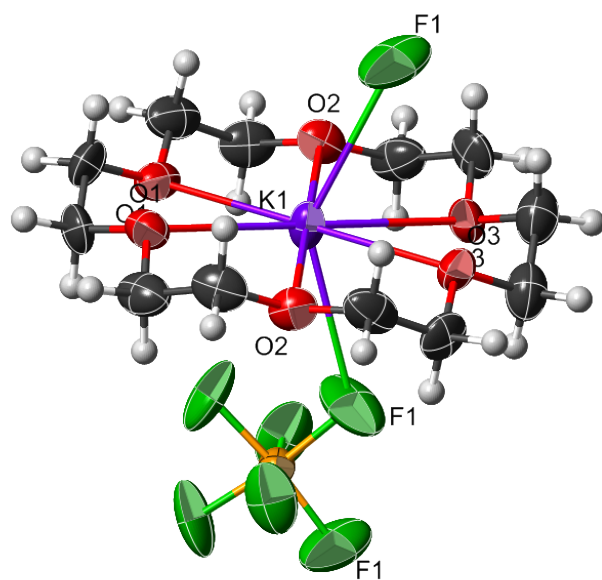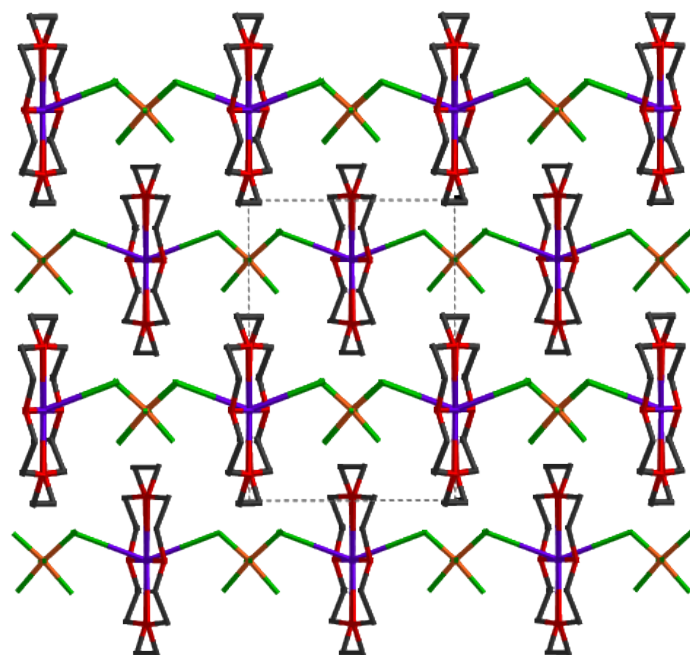

**Figure S6.** Thermal ellipsoid model (upper) and packing structure along *b*-axis (lower) of  $[\text{K}(\text{18C6})]_1\text{PF}_6$ . The ellipsoids of non-hydrogen atoms are drawn at the 50 % probability level while isotropic hydrogen atoms are represented by spheres of arbitrary size. The disordered atoms and labels of uncoordinating atoms are omitted for clarity. The expanded structure is shown here. CCDC: 1030106.

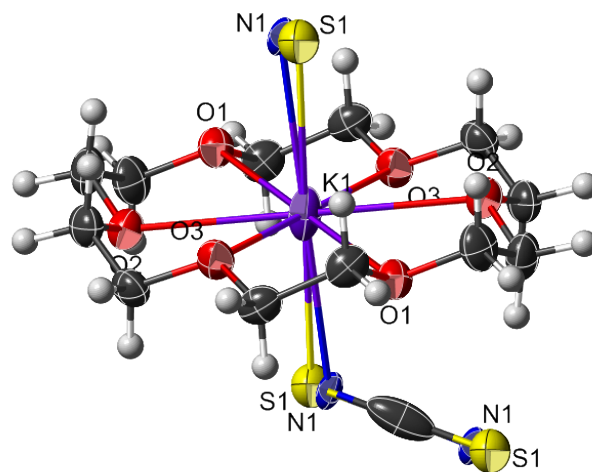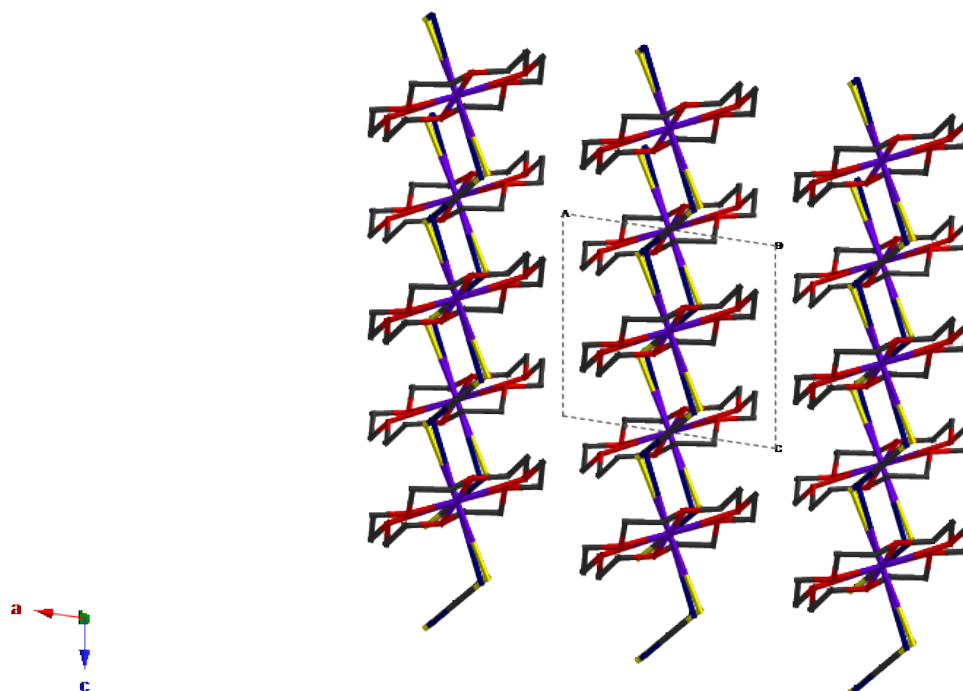

**Figure S7.** Thermal ellipsoid model (upper) and packing structure along *b*-axis (lower) of  $[\text{K}(\text{18C6})]_{\text{1}}\text{SCN}$ . The ellipsoids of non-hydrogen atoms are drawn at the 50 % probability level while isotropic hydrogen atoms are represented by spheres of arbitrary size. The labels of uncoordinating atoms are omitted for clarity. The expanded structure is shown here. CCDC: 1030107.

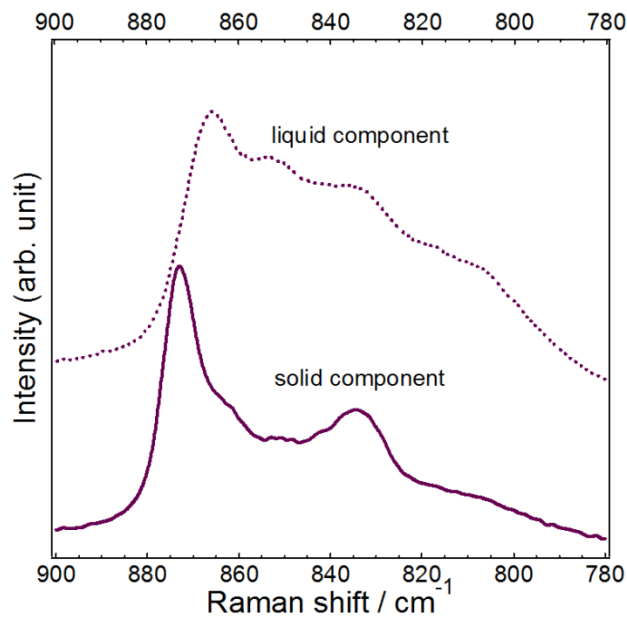

**Figure S8.** Raman spectra of the precipitated solid and supernatant liquid components for  $[\text{K}(\text{G}5)_2]\text{PF}_6$  in the range of  $900\text{--}780\text{ cm}^{-1}$  at ambient temperature.

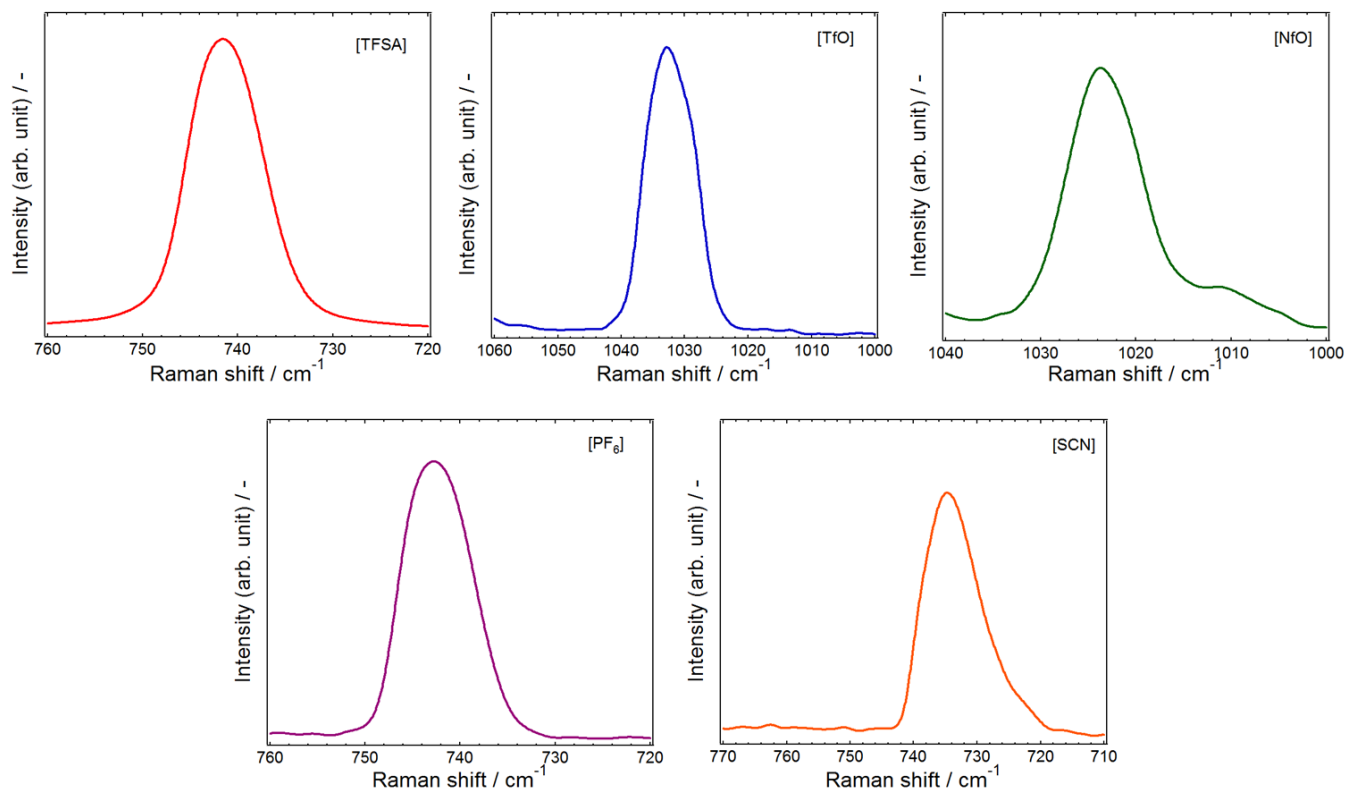

**Figure S9.** Anionic Raman spectra for  $[\text{K}(\text{18C}6)_1][\text{TFSA}]$ ,  $[\text{K}(\text{18C}6)_1][\text{TfO}]$ ,  $[\text{K}(\text{18C}6)_1][\text{NfO}]$ ,  $[\text{K}(\text{18C}6)_1]\text{PF}_6$ , and  $[\text{K}(\text{18C}6)_1]\text{SCN}$  in the crystalline state measured at ambient temperature.

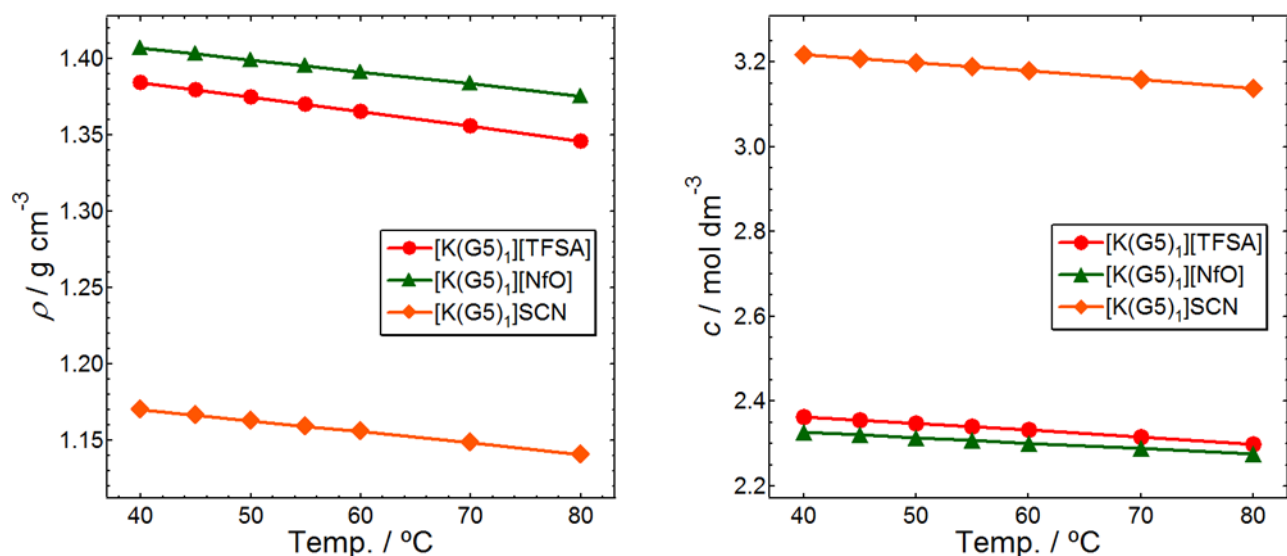

**Figure S10.** Temperature dependences of the density (left) and concentration (right) for [K(G5)<sub>1</sub>][TFSA], [K(G5)<sub>1</sub>][NfO], and [K(G5)<sub>1</sub>][SCN].

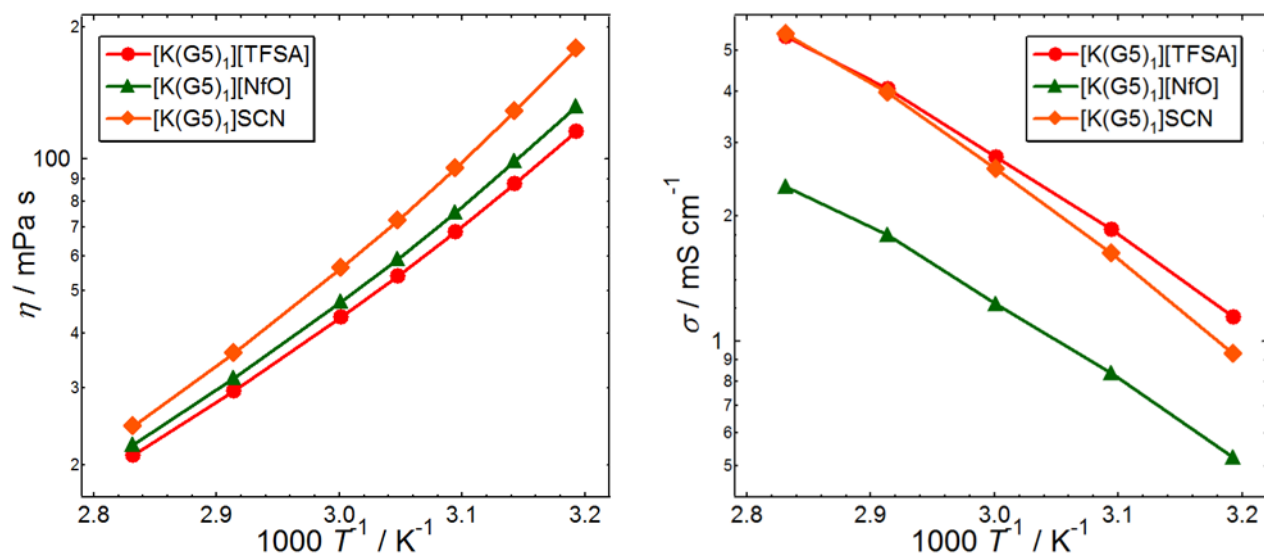

**Figure S11.** Temperature dependences of the viscosity (left) and ionic conductivity (right) for [K(G5)<sub>1</sub>][TFSA], [K(G5)<sub>1</sub>][NfO], and [K(G5)<sub>1</sub>][SCN].
